# Supplementary material for: Long-acting injectable atovaquone nanomedicines for malaria prophylaxis
Source: PubMed Central journal article supplement (PMC5778127; doi:10.1038/s41467-017-02603-z), 2018-01-22
Supplement: 41467_2017_2603_MOESM1_ESM.pdf [file 41467_2017_2603_MOESM1_ESM.pdf]

## Supplementary Information

### Supplementary Figures

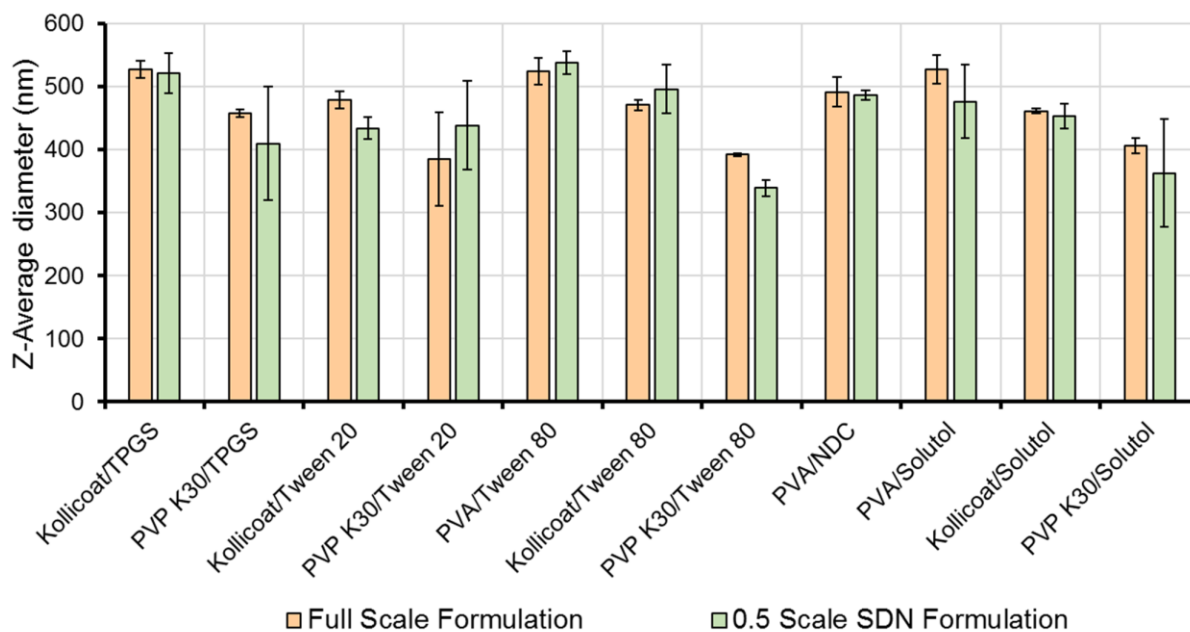

**Supplementary Fig. 1** Characterization of nanoformulation candidates. Formulation reproducibility of screen 'hits' (error bars denote  $\pm 1$  SD; three repeats) with concordance between full-scale and half-scale EFTD;  $^3\text{H}$ -labelled atovaquone inclusion used on half-scale SDN synthesis.

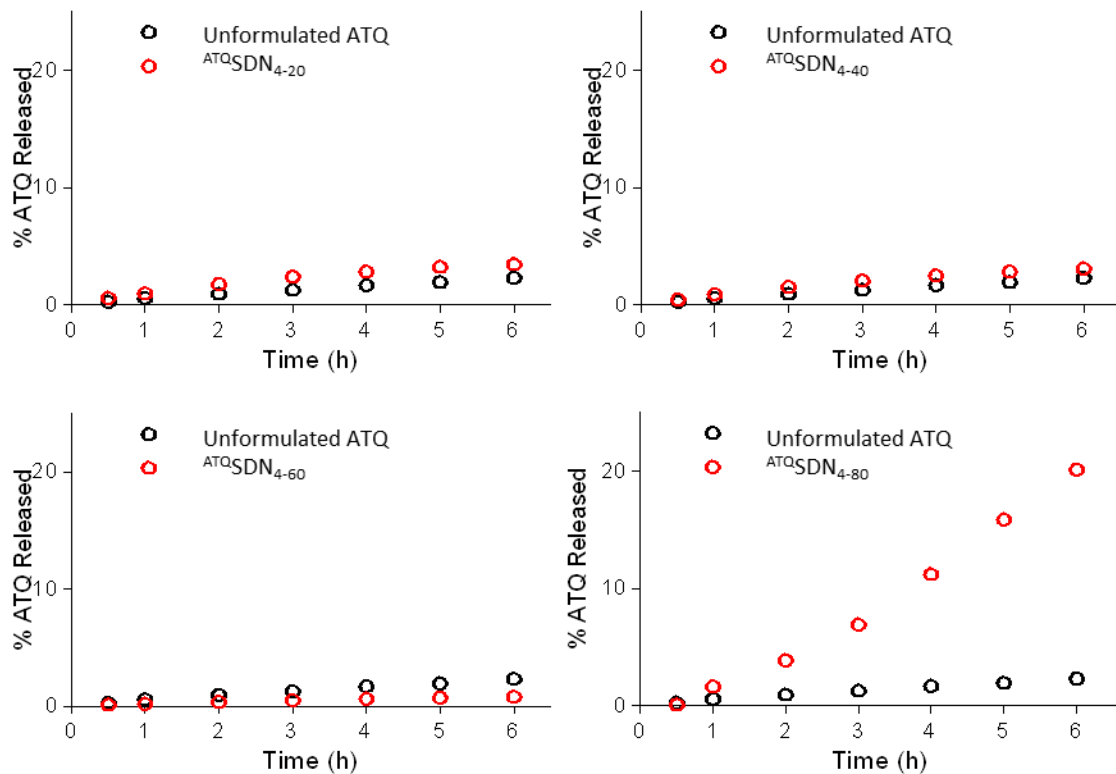

**Supplementary Fig. 2** Comparison of rapid equilibrium dialysis release rate measurements of <sup>ATQ</sup>SDN<sub>4</sub> at 20 (<sup>ATQ</sup>SDN<sub>4-20</sub>), 40 (<sup>ATQ</sup>SDN<sub>4-40</sub>), 60 (<sup>ATQ</sup>SDN<sub>4-60</sub>) and 80 (<sup>ATQ</sup>SDN<sub>4-80</sub>) wt% drug loading. For release rate studies, samples were prepared incorporating <sup>3</sup>H-atovaquone at 0.2 μCi mg<sup>-1</sup> specific activity. <sup>ATQ</sup>SDN<sub>4</sub> was selected on the basis that it exhibited the highest release rate in the initial screen.

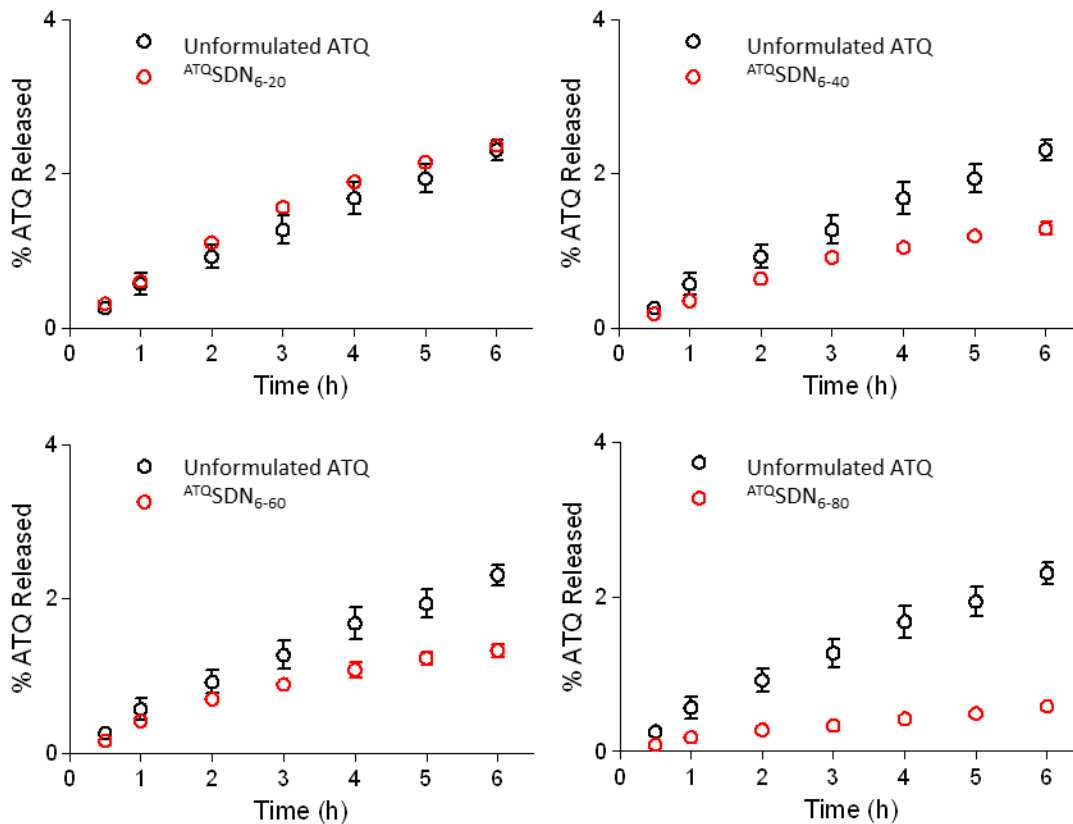

**Supplementary Fig. 3** Comparison of rapid equilibrium dialysis release rate measurements of <sup>ATQ</sup>SDN<sub>6</sub> at 20 (<sup>ATQ</sup>SDN<sub>6-20</sub>), 40 (<sup>ATQ</sup>SDN<sub>6-40</sub>), 60 (<sup>ATQ</sup>SDN<sub>6-60</sub>) and 80 (<sup>ATQ</sup>SDN<sub>6-80</sub>) wt% drug loading. For release rate studies, samples were prepared incorporating <sup>3</sup>H-atovaquone at 0.2 μCi mg<sup>-1</sup> specific activity. <sup>ATQ</sup>SDN<sub>6</sub> was selected on the basis that it exhibited the lowest release rate in the initial screen.

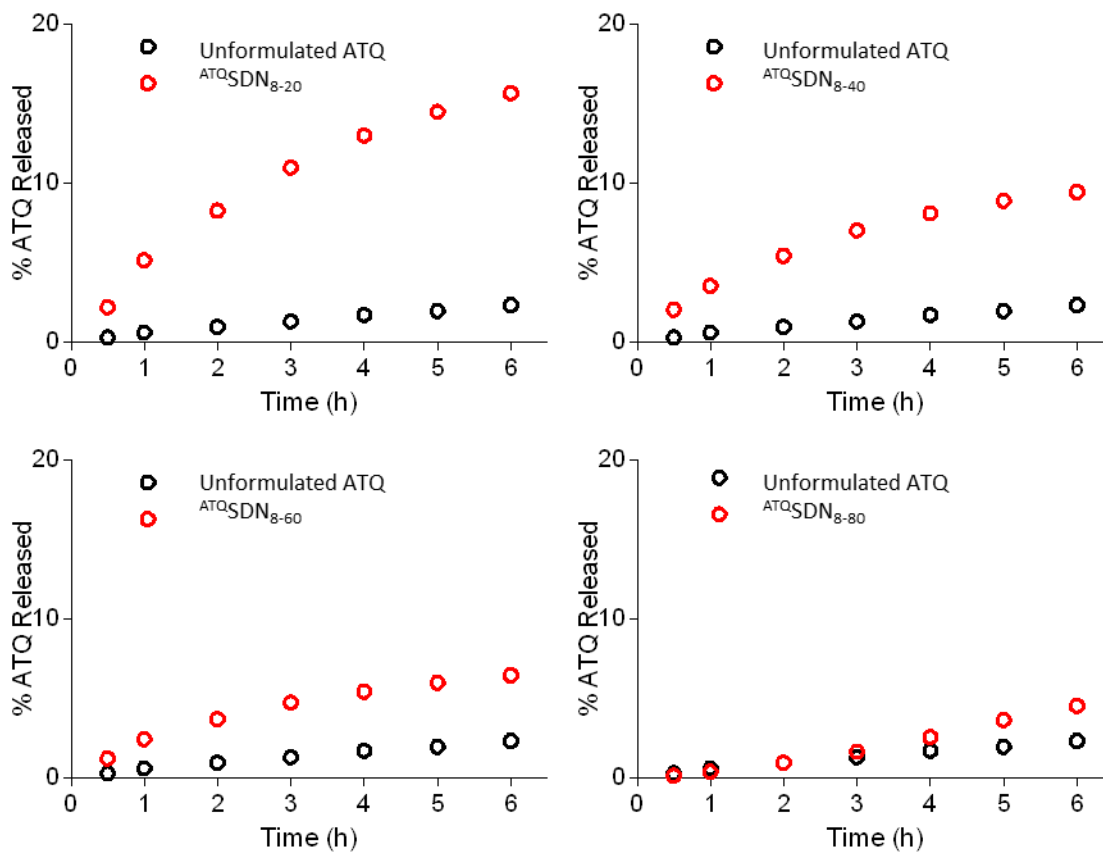

**Supplementary Fig. 4** Comparison of rapid equilibrium dialysis release rate measurements of <sup>ATQ</sup>SDN<sub>8</sub> at 20 (<sup>ATQ</sup>SDN<sub>8-20</sub>), 40 (<sup>ATQ</sup>SDN<sub>8-40</sub>), 60 (<sup>ATQ</sup>SDN<sub>8-60</sub>) and 80 (<sup>ATQ</sup>SDN<sub>8-80</sub>) wt% drug loading. For release rate studies, samples were prepared incorporating <sup>3</sup>H-atovaquone at 0.2 μ Ci mg<sup>-1</sup> specific activity. <sup>ATQ</sup>SDN<sub>8</sub> was selected on the basis that it exhibited an intermediate release rate in the initial screen.

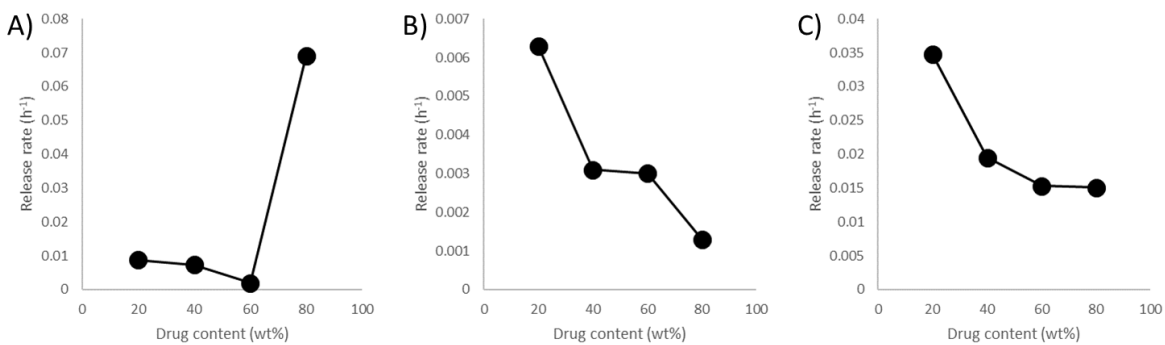

**Supplementary Fig. 5** Rapid equilibrium dialysis release rates of <sup>ATQ</sup>SDN nanoformulations with systematically varying atovaquone loading relative to excipients at 6 hours. <sup>ATQ</sup>SDN<sub>4</sub> (A), <sup>ATQ</sup>SDN<sub>6</sub> (B) and <sup>ATQ</sup>SDN<sub>8</sub> (C) were selected on the basis that they exhibited the highest, lowest and intermediate release rate during screening, respectively.

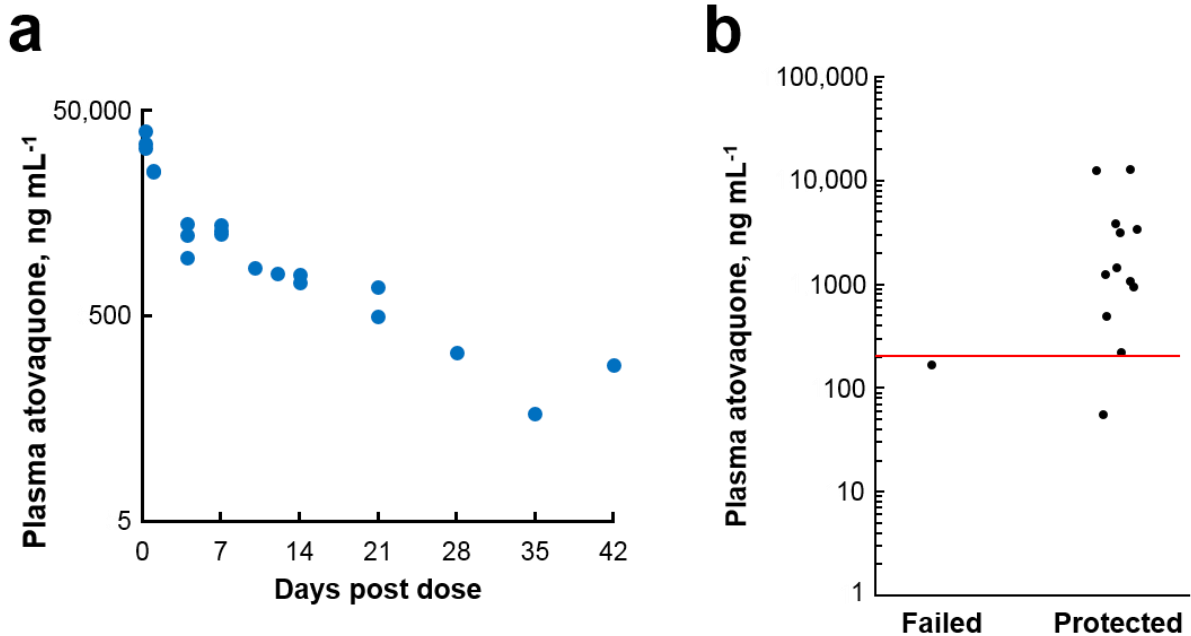

**Supplementary Fig. 6** Biological testing of <sup>ATQ</sup>SDN<sub>8</sub>. **a**, Plasma was collected at indicated intervals for assay of atovaquone concentrations in mice dosed intramuscularly with 200 mg kg<sup>-1</sup> <sup>ATQ</sup>SDN<sub>8</sub>. Log-transformed concentrations yield a plasma half-life of 163 h (using 4 - 42 d values, inclusive; R<sup>2</sup>, 0.889); data obtained in 4 independent experiments. **b**, Plasma atovaquone concentrations >200 ng mL<sup>-1</sup> at the time of challenge correlate closely with efficacy. Each dot represents a cohort of 3-5 mice, 7 to 42 d after a single intramuscular dose of 50, 100 or 200 mg kg<sup>-1</sup> <sup>ATQ</sup>SDN<sub>8</sub>. Data from four independent experiments.

## Supplementary Tables

**Supplementary Table 1: Nanoformulation ‘hits’ from synthesis screen.** All contain 80 wt% atovaquone.

| <b>Formulation</b>               | <b>Polymer</b><br>(13% by weight) | <b>Surfactant</b><br>(7% by weight) | $D_z^a$<br>(nm) | <b>PdI<sup>b</sup></b> | <b>Zeta Potential</b><br>(mV) |
|----------------------------------|-----------------------------------|-------------------------------------|-----------------|------------------------|-------------------------------|
| <sup>ATQ</sup> SDN <sub>1</sub>  | Kollicoat                         | TPGS                                | 477             | 0.281                  | 8.2                           |
| <sup>ATQ</sup> SDN <sub>2</sub>  | PVP K30                           | TPGS                                | 346             | 0.261                  | -19.5                         |
| <sup>ATQ</sup> SDN <sub>3</sub>  | Kollicoat                         | Tween 20                            | 440             | 0.322                  | -16.3                         |
| <sup>ATQ</sup> SDN <sub>4</sub>  | PVP K30                           | Tween 20                            | 388             | 0.284                  | -16.4                         |
| <sup>ATQ</sup> SDN <sub>5</sub>  | PVA                               | Tween 80                            | 526             | 0.369                  | -20.4                         |
| <sup>ATQ</sup> SDN <sub>6</sub>  | Kollicoat                         | Tween 80                            | 454             | 0.309                  | -12.8                         |
| <sup>ATQ</sup> SDN <sub>7</sub>  | PVP K30                           | Tween 80                            | 298             | 0.296                  | -16.4                         |
| <sup>ATQ</sup> SDN <sub>8</sub>  | PVA                               | NDC                                 | 445             | 0.345                  | -12.2                         |
| <sup>ATQ</sup> SDN <sub>9</sub>  | PVA                               | Solutol                             | 517             | 0.352                  | -15.5                         |
| <sup>ATQ</sup> SDN <sub>10</sub> | Kollicoat                         | Solutol                             | 440             | 0.332                  | -17.0                         |
| <sup>ATQ</sup> SDN <sub>11</sub> | PVP K30                           | Solutol                             | 384             | 0.337                  | -17.2                         |

<sup>a</sup>  $D_z$  = Z-average diameter; <sup>b</sup> PdI = Polydispersity index

**Supplementary Table 2: Physical characterisation of <sup>ATQ</sup>SDN nanoformulations with systematically varying drug loading relative to excipients.** For release rate studies, samples were prepared incorporating <sup>3</sup>H-atovaquone at 0.2  $\mu\text{Ci mg}^{-1}$  specific activity.

| Sample                             | ATQ wt% | Name      | wt% | Name     | wt% | $D_z$ (nm) <sup>a</sup> | PdI <sup>b</sup> |
|------------------------------------|---------|-----------|-----|----------|-----|-------------------------|------------------|
| <sup>ATQ</sup> SDN <sub>4-20</sub> | 20      | PVP K30   | 52  | Tween 20 | 28  | 505                     | 0.151            |
| <sup>ATQ</sup> SDN <sub>4-40</sub> | 40      | PVP K30   | 39  | Tween 20 | 21  | 407                     | 0.222            |
| <sup>ATQ</sup> SDN <sub>4-60</sub> | 60      | PVP K30   | 26  | Tween 20 | 14  | 439                     | 0.322            |
| <sup>ATQ</sup> SDN <sub>6-20</sub> | 20      | Kollicoat | 52  | Tween 80 | 28  | 669                     | 0.226            |
| <sup>ATQ</sup> SDN <sub>6-40</sub> | 40      | Kollicoat | 39  | Tween 80 | 21  | 468                     | 0.236            |
| <sup>ATQ</sup> SDN <sub>6-60</sub> | 60      | Kollicoat | 26  | Tween 80 | 14  | 510                     | 0.302            |
| <sup>ATQ</sup> SDN <sub>8-20</sub> | 20      | PVA       | 52  | NDC      | 28  | 891                     | 0.199            |
| <sup>ATQ</sup> SDN <sub>8-40</sub> | 40      | PVA       | 39  | NDC      | 21  | 524                     | 0.322            |
| <sup>ATQ</sup> SDN <sub>8-60</sub> | 60      | PVA       | 26  | NDC      | 14  | 438                     | 0.256            |

<sup>a</sup>  $D_z$  = Z-average diameter; <sup>b</sup> PdI = Polydispersity index
